# Supplementary material
Source: PubMed Central journal article supplement (PMC4187226)
Supplement: peds.2013-2734_peds.2013-2734SupplementaryData.pdf [file peds.2013-2734_peds.2013-2734SupplementaryData.pdf]

## Supplemental Information

**SUPPLEMENTAL TABLE 4** Odds Ratios of Mental Health Problems in HIV-Affected and HIV-Positive Children, Compared With HIV-Unaffected Children, Adjusted for Age, Gender, and SES, Child Reports  $n = 683$

|                           | Odds Ratio (95% CI)           |
|---------------------------|-------------------------------|
| Mental health problem     |                               |
| Depression                |                               |
| HIV-affected              | 1.68 (1.15–2.44) <sup>a</sup> |
| HIV-positive              | 1.32 (0.90–1.95)              |
| YSR anxiety/internalizing |                               |
| HIV-affected              | 1.77 (1.14–2.75) <sup>a</sup> |
| HIV-positive              | 1.13 (0.71–1.81)              |
| Conduct problems          |                               |
| HIV-affected              | 1.59 (1.04–2.45) <sup>a</sup> |
| HIV-positive              | 1.34 (0.86–2.10)              |

<sup>a</sup> Significant at  $\alpha \leq 0.05$ .

**SUPPLEMENTAL TABLE 5** Contextual Factors and Family Dynamics in HIV-Affected and HIV-Positive Children, Compared With HIV-Unaffected Children, Parent Reports  $n = 683$

|                              | Parent Report    |                      |                   |                      |
|------------------------------|------------------|----------------------|-------------------|----------------------|
|                              | Mean (95% CI)    | Effect Size (95% CI) | Mean (95% CI)     | Effect Size (95% CI) |
| Harsh punishment             |                  |                      |                   |                      |
| Unaffected                   | 0.26 (0.23–0.30) | —                    | 0.25 (0.23–0.28)  | —                    |
| Affected                     | 0.31 (0.28–0.34) | 0.19 (0.01–0.37)     | 0.30 (0.28–0.33)  | 0.24 (0.06–0.42)     |
| Positive                     | 0.27 (0.24–0.31) | 0.04 (–0.13–0.22)    | 0.23 (0.20–0.25)  | –0.14 (–0.32–0.05)   |
| Stigma                       |                  |                      |                   |                      |
| Unaffected                   | 0.22 (0.16–0.29) | —                    | 0.16 (0.08–0.24)  | —                    |
| Affected                     | 0.40 (0.33–0.47) | 0.32 (0.15–0.50)     | 0.43 (0.35–0.51)  | 0.41 (0.24–0.59)     |
| Positive                     | 0.49 (0.42–0.56) | 0.50 (0.32–0.68)     | 0.61 (0.53–0.69)  | 0.69 (0.51–0.87)     |
| Daily hardships              |                  |                      |                   |                      |
| Unaffected                   | 2.81 (2.41–3.21) | —                    | 8.31 (7.66–8.96)  | —                    |
| Affected                     | 3.57 (3.16–3.97) | 0.24 (0.06–0.43)     | 9.45 (8.79–10.11) | 0.22 (0.04–0.41)     |
| Positive                     | 2.95 (2.54–3.36) | 0.05 (–0.14–0.23)    | 8.54 (7.86–9.22)  | 0.04 (–0.14–0.23)    |
| Parental mental health, HSCL |                  |                      |                   |                      |
| Unaffected                   | NA               | NA                   | 1.02 (0.94–1.10)  | —                    |
| Affected                     | NA               | NA                   | 1.22 (1.14–1.30)  | 0.32 (0.14–0.50)     |
| Positive                     | NA               | NA                   | 1.03 (0.95–1.11)  | 0.02 (–0.16–0.20)    |

—, reference group; NA, no HSCL data collected.
